# Supplementary material for: Genome-wide promoter assembly in E. coli measured at single-base resolution
Source: PubMed Central journal article supplement — Genome Res. 2022 May;32(5):878–92. doi: 10.1101/gr.276544.121 (PMC9104697; doi:10.1101/gr.276544.121), 2022-05
Supplement: supp_gr.276544.121_Supplemental_Fig_S1.pdf [file supp_gr.276544.121_Supplemental_Fig_S1.pdf]

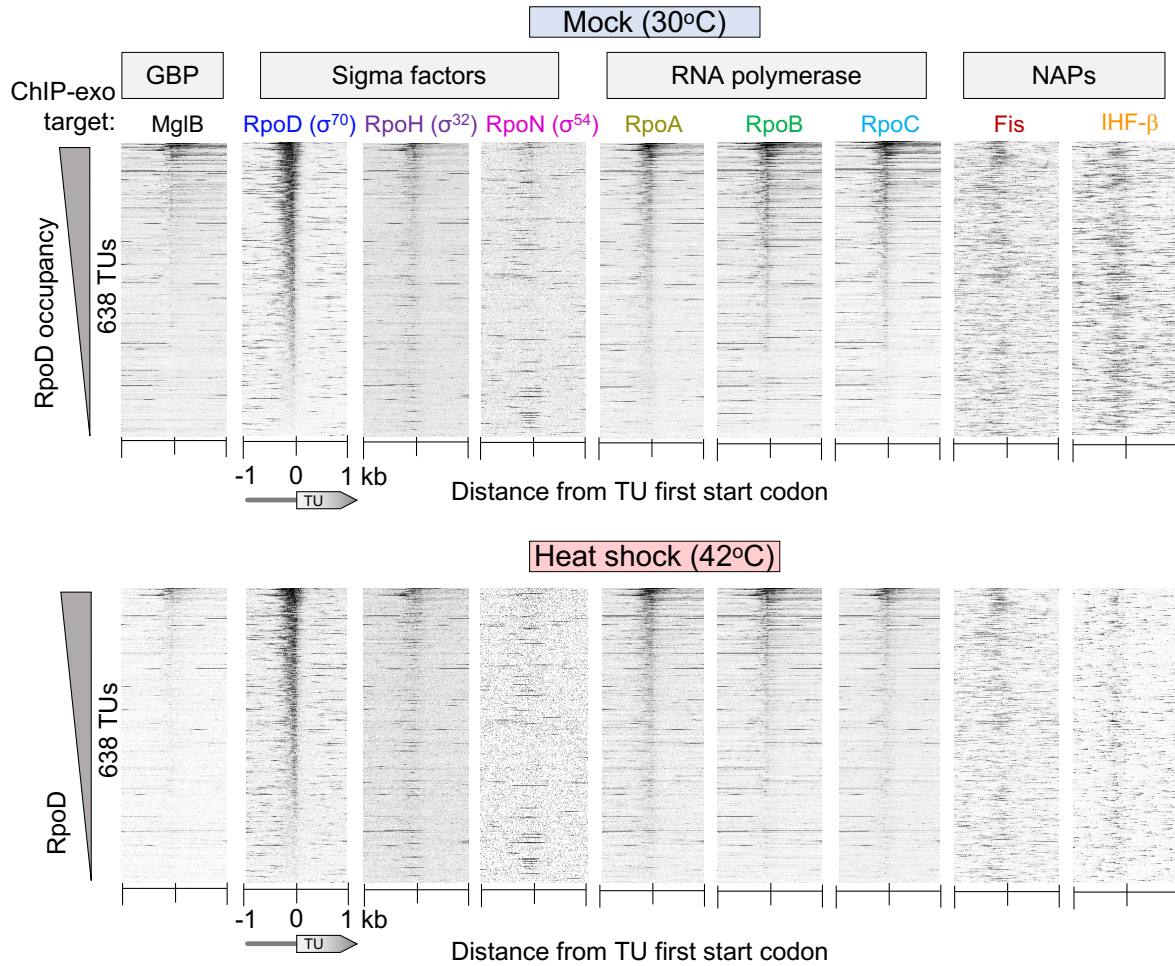

**Supplemental Fig S1.** Sigma factors and RNAP binding at RpoD promoter regions under normal and heat shock conditions. Images are identical to Fig. 1A, except that data from acute heat shock (42°C for 6 min) were added (lower set of panels). Shown are heatmap occupancy distribution of indicated protein targets as measured by ChIP-exo. Transcription units (rows, N=638 TUs) are aligned by their ATG start codons (5'-3', left to right) and sorted by RpoD occupancy (-80 to +80 bp from TU ATG start) at 30°C. ATG starts were used instead of TSSs since TSSs have more experimental error, condition-specific biological variability, and variance among strains, compared to DNA elements. Sense and antisense tags were shifted in the 3' direction by 6 bp (to adjust for the headroom of lambda exonuclease) and merged. Datafiles have an x-axis bin size of 2 bp.
