# Supplementary material for: Genome-wide promoter assembly in E. coli measured at single-base resolution
Source: PubMed Central journal article supplement — Genome Res. 2022 May;32(5):878–92. doi: 10.1101/gr.276544.121 (PMC9104697; doi:10.1101/gr.276544.121), 2022-05
Supplement: supp_gr.276544.121_Supplemental_Fig_S2.pdf [file supp_gr.276544.121_Supplemental_Fig_S2.pdf]

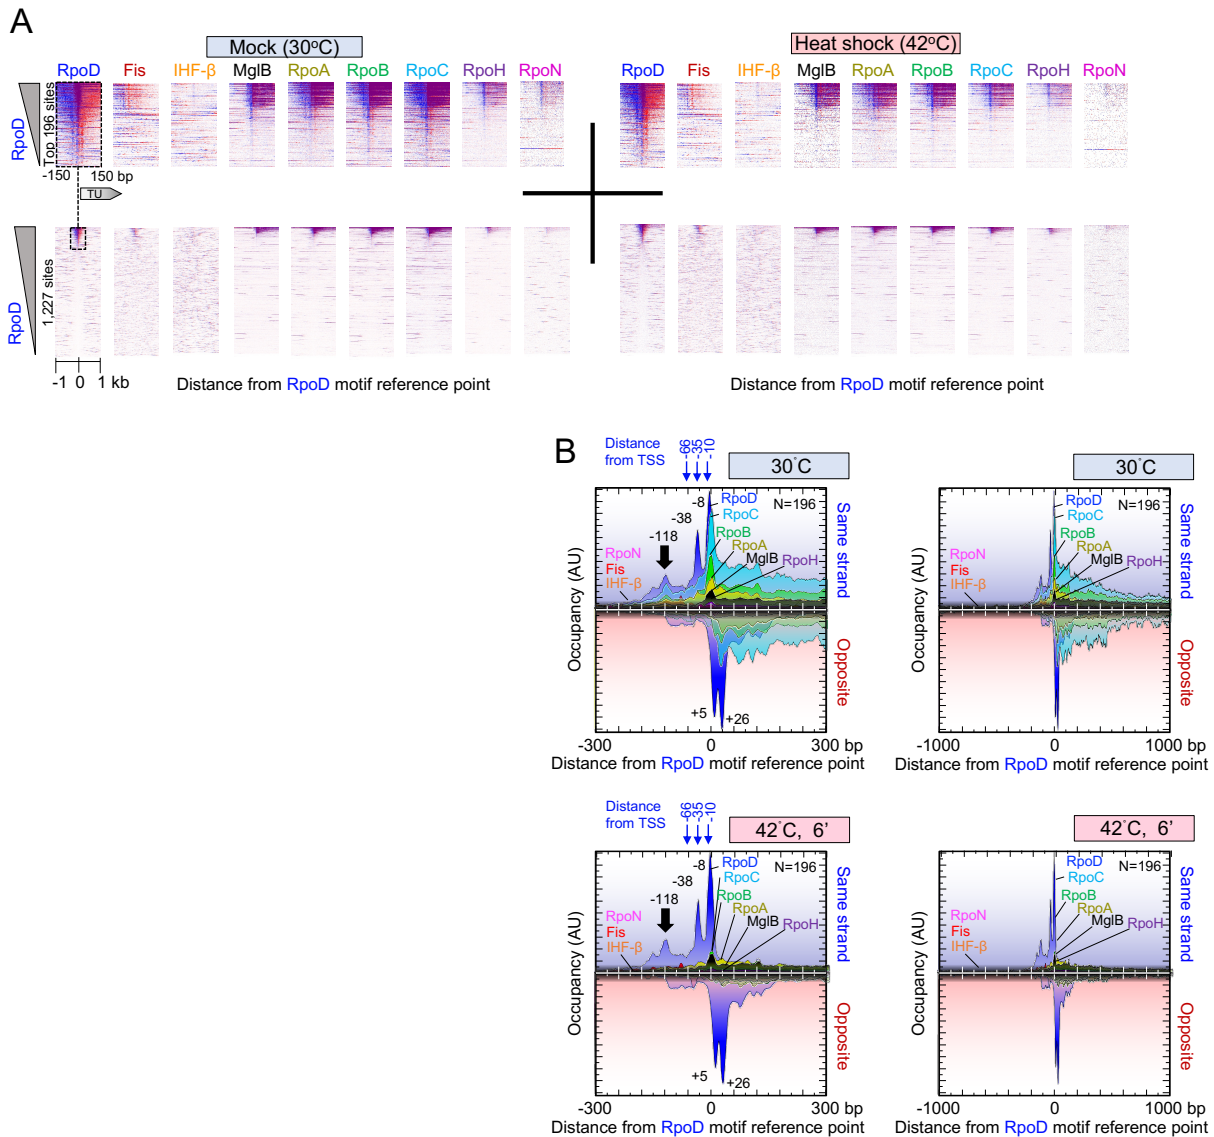

**Supplemental Fig S2.** ChIP-exo patterns around RpoD motifs. Some panels are identical to Fig. 2B, D, with data from acute heat shock (42°C for 6 min) were added (lower sets of panels).

**A)** Shown are occupancy heatmaps of indicated protein targets as measured by ChIP-exo at 30°C. Rows correspond to RpoD motif instances (N = 1,227, bottom panel) aligned by the reference point indicated in Fig. 2A. Blue indicates exonuclease stop sites on the sense/motif strand (sequence tag Read\_1 5' ends); red is the same on the antisense/opposite strand. Top panels show a zoom in of the relevant section of the bottom panels. All data are sorted based on RpoD occupancy  $\pm 50$  bp from the motif reference point.

**B)** Shown are composite plots of panel A, where the antisense/opposite strand data are inverted (N=196). Both are shown on linear y-axis scales that are arbitrary for each target and condition, and thus not comparable between each target and condition. Relative peak heights are comparable within a dataset. Data files have an x-axis bin size of 2 bp and smoothed with a 5 bp moving average. Composites are also shown from  $\pm 300$  bp and  $\pm 1000$  bp from the reference motif.
