# Supplementary material for: Genome-wide promoter assembly in E. coli measured at single-base resolution
Source: PubMed Central journal article supplement — Genome Res. 2022 May;32(5):878–92. doi: 10.1101/gr.276544.121 (PMC9104697; doi:10.1101/gr.276544.121), 2022-05
Supplement: supp_gr.276544.121_Supplemental_Fig_S3.pdf [file supp_gr.276544.121_Supplemental_Fig_S3.pdf]

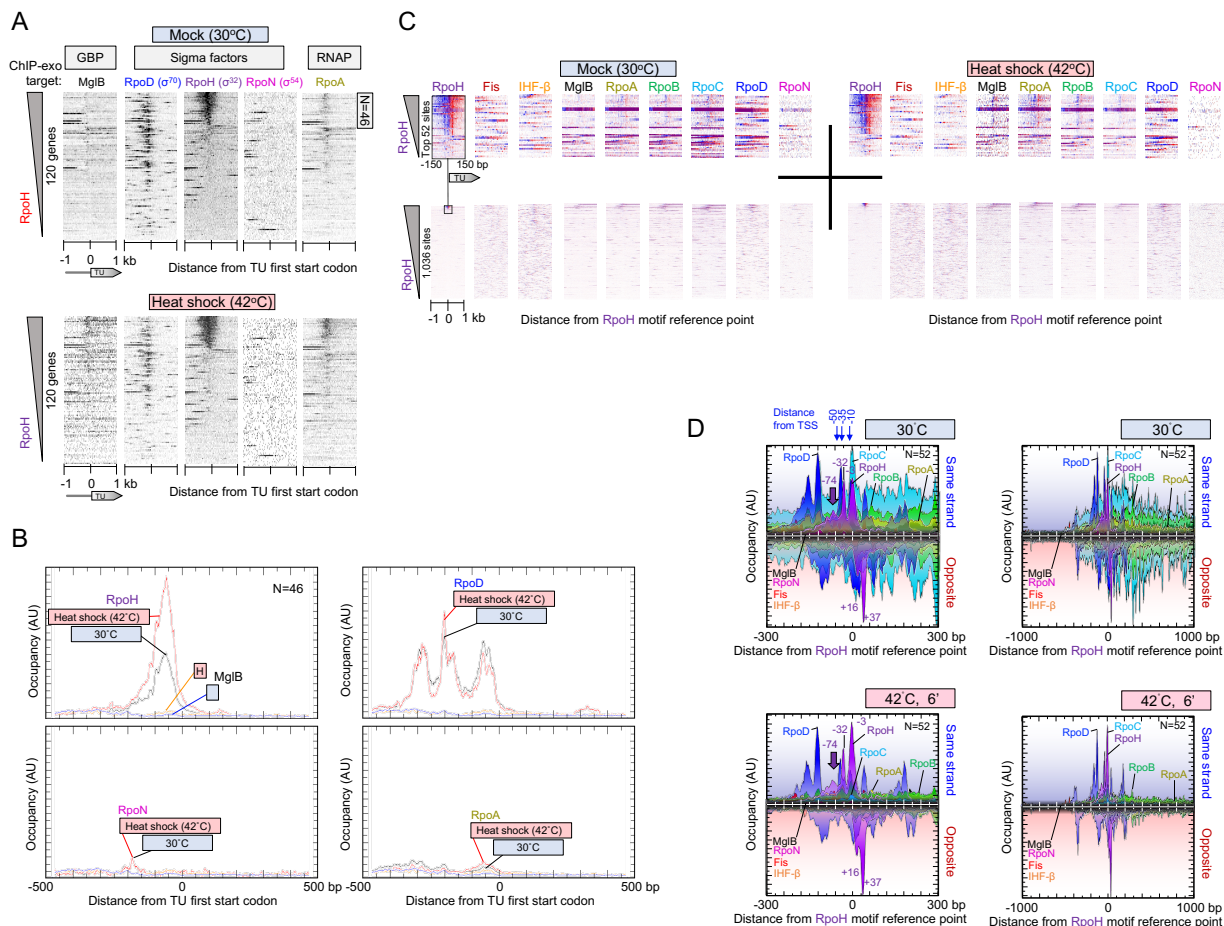

**Supplemental Fig S3.** Occupancy and ChIP-exo patterning around RpoH motifs. Some panels are identical to Fig. 3A, B, E, F for heat shock genes except that acute heat shock (42°C for 6 min) data were added.

**A)** Shown are distributions of RpoH around the ATG start codons of previously defined heat shock genes (Nonaka et al. 2006; Gama-Castro et al. 2016). Data are sorted based on RpoH occupancy  $\pm 120$  bp from the ATG start of each gene. Transcription units (rows,  $N=120$  TUs) are aligned by their ATG start codons (5'-3', left to right) and sorted by RpoD occupancy (summed -80 to +80 bp from TU ATG start) at 30°C. Sense and antisense tags were shifted in the 3' direction by 6 bp (to adjust for the headroom of lambda exonuclease) and merged. Data files have an x-axis bin size of 2 bp.

**B)** Shown are composite plots of RpoH (from Fig. 3B), RpoD, RpoN, and RpoA occupancy of the top-most RpoH-bound TUs from panel A ( $N=46$ ). AU denotes arbitrary linear units. Datafiles have an x-axis bin size of 2 bp. The MglB data are the same in both panels. To compare y-axis magnitudes between same-target samples from 30°C and 42°C, gene-averaged y-axis values were empirically scaled (i.e., one scaling factor per dataset) to achieve similar y-axis minima values in the x-axis window (i.e., to achieve similar average local background). This assumes that the minima are background.

**C)** Occupancy heatmap of indicated protein targets distributed around the RpoH motif reference point in Fig. 3D. Blue indicates exonuclease stop sites on the sense/motif strand (sequence tag Read\_1 5' ends); red is the same on the antisense/opposite strand. Top panels show a zoom in of the relevant section of the bottom panels. Data are sorted based on RpoH occupancy  $\pm 50$  bp from the reference point.

**D)** Shown are composite plots of panel C, where the antisense/opposite strand data are inverted ( $N=52$ ). Both are shown on linear y-axis scales that are arbitrary for each target and condition, and thus not comparable between each target and condition. Relative peak heights are comparable within a dataset. Data files have an x-axis bin size of 2 bp and smoothed with a 3 bp moving average. Composites are also shown from  $\pm 300$  bp and  $\pm 1000$  bp from the reference motif.
