# Supplementary material for: Genome-wide promoter assembly in E. coli measured at single-base resolution
Source: PubMed Central journal article supplement — Genome Res. 2022 May;32(5):878–92. doi: 10.1101/gr.276544.121 (PMC9104697; doi:10.1101/gr.276544.121), 2022-05
Supplement: supp_gr.276544.121_Supplemental_Fig_S4.pdf [file supp_gr.276544.121_Supplemental_Fig_S4.pdf]

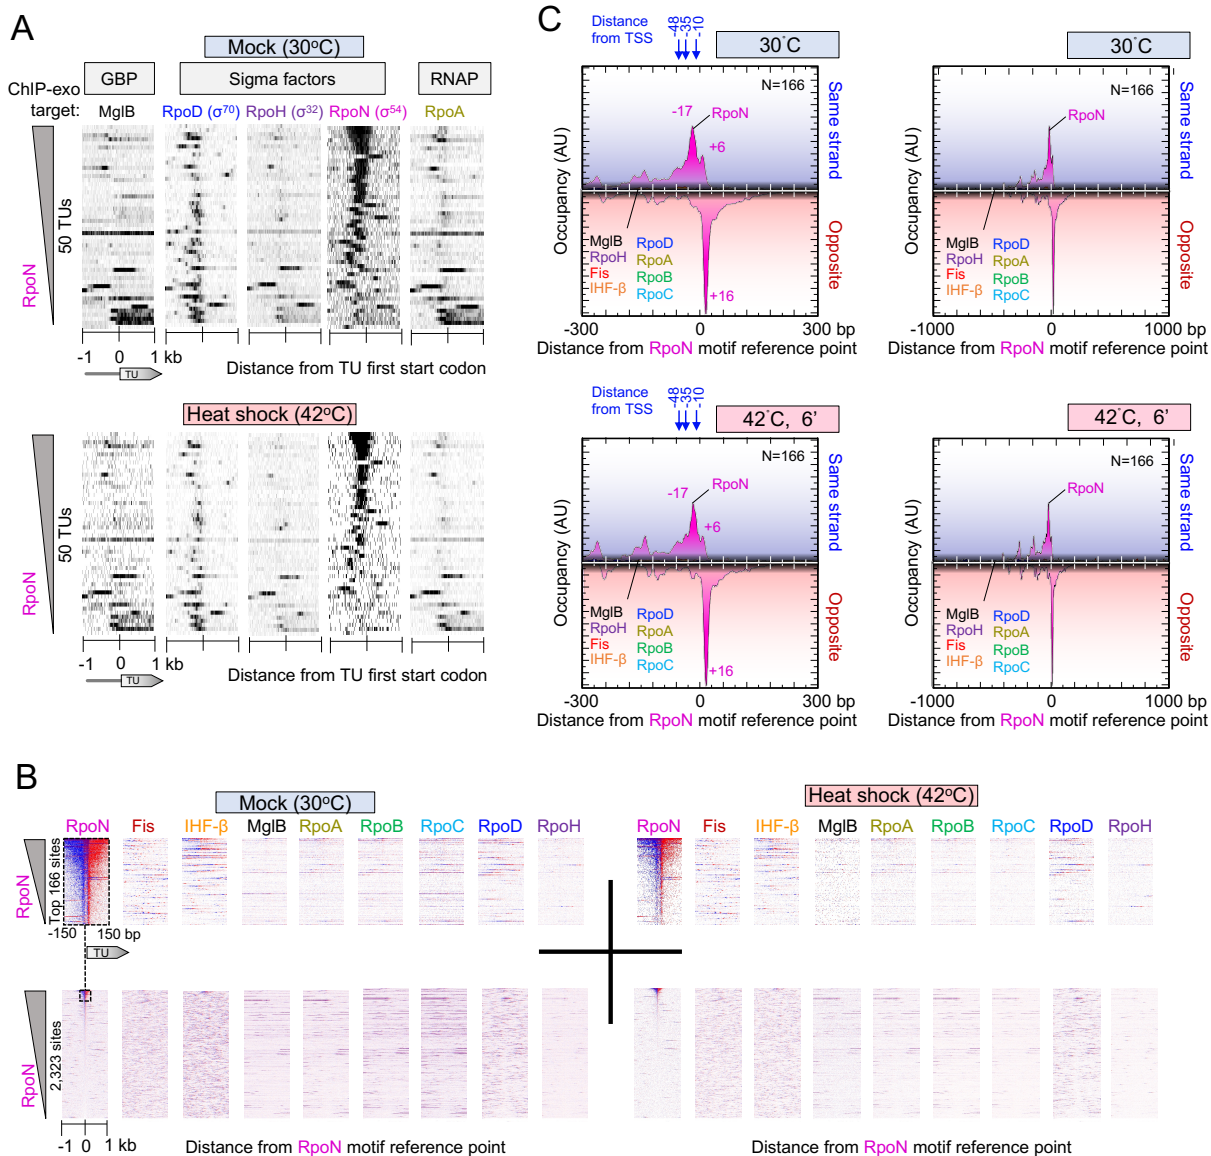

**Supplemental Fig S4.** Occupancy and ChIP-exo patterning around RpoN motifs. Some panels are identical to Fig. 4A, D, E except that acute heat shock data were added.

**A)** Shown are distribution of RpoN around the ATG start codons of RpoN-bound TU. Data are sorted based on RpoN occupancy  $\pm 500$  bp from the ATG start of each gene. Transcription units (rows, N=50 TUs) are aligned by their ATG start codons (5'-3', left to right) and sorted by RpoD occupancy (summed -80 to +80 bp from TU ATG start) at 30°C. Sense and antisense tags were shifted in the 3' direction by 6 bp (to adjust for the headroom of lambda exonuclease) and merged. Data files have an x-axis bin size of 2 bp.

**B)** Shown are occupancy heatmaps of indicated protein targets distributed around the RpoN motif reference point defined in Fig. 4C. Both are shown on linear y-axis scales that are arbitrary for each target and condition, and thus not comparable between each target and condition. Relative peak heights are comparable within a dataset.

**C)** Shown are composite plots of panel B, where the antisense/opposite strand data are inverted (N=166). Both are shown on linear y-axis scales that are arbitrary for each target and condition, and thus not comparable between each target and condition. Relative peak heights are comparable within a dataset. Data files have an x-axis bin size of 2 bp and smoothed with a 3 bp moving average. Composites are also shown from  $\pm 300$  bp and  $\pm 1000$  bp from the reference motif.
