# Supplementary material for: Genome-wide promoter assembly in E. coli measured at single-base resolution
Source: PubMed Central journal article supplement — Genome Res. 2022 May;32(5):878–92. doi: 10.1101/gr.276544.121 (PMC9104697; doi:10.1101/gr.276544.121), 2022-05
Supplement: supp_gr.276544.121_Supplemental_Fig_S5.pdf [file supp_gr.276544.121_Supplemental_Fig_S5.pdf]

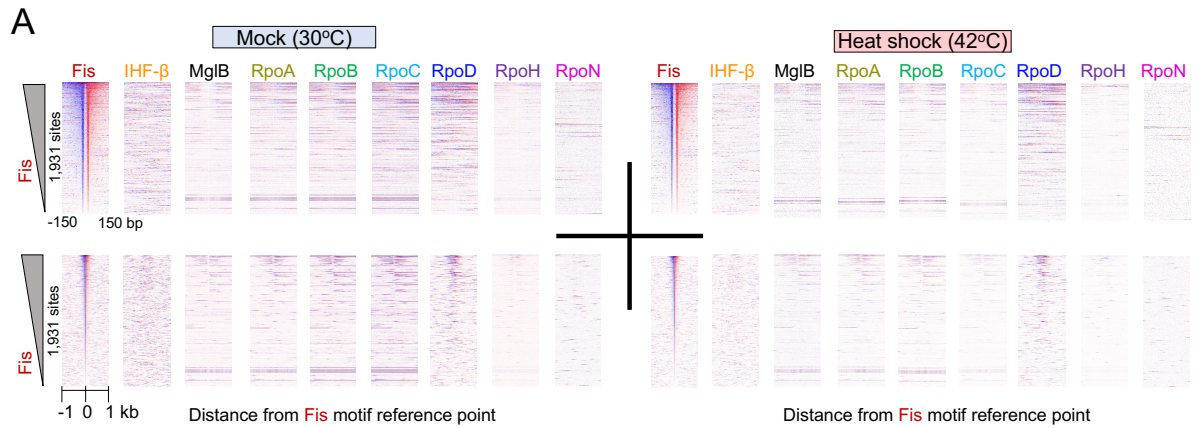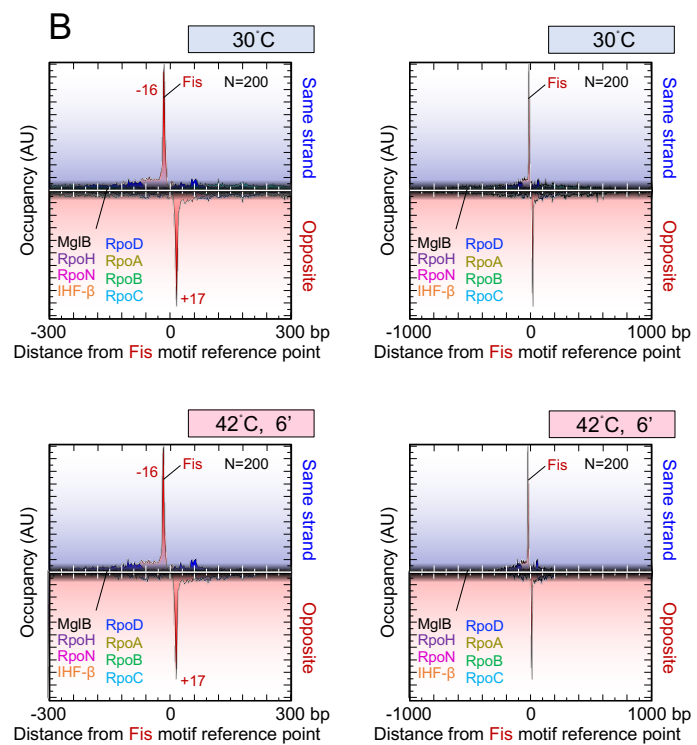

**Supplemental Fig S5.** Occupancy and ChIP-exo patterning around Fis motifs. Some panels are identical to Fig. 5D, E for Fis-bound motifs except that acute heat shock data were added.

**A)** Shown are occupancy heatmaps of indicated protein targets at 30°C distributed around the Fis motif reference point defined in Fig. 5C. Both are shown on linear y-axis scales that are arbitrary for each target and condition, and thus not comparable between each target and condition. Relative peak heights are comparable within a dataset.

**B)** Shown are composite plots of panel A, where the antisense/opposite strand data are inverted (N=200). Both are shown on linear y-axis scales that are arbitrary for each target and condition, and thus not comparable between each target and condition. Relative peak heights are comparable within a dataset. Data files have an x-axis bin size of 2 bp and smoothed with a 3 bp moving average. Composites are also shown from ±300 bp and ±1000 bp from the reference motif.
