# Supplementary material for: Genome-wide promoter assembly in E. coli measured at single-base resolution
Source: HighWire-hosted journal article supplement (doi:10.1101/gr.276544.121), 2022-04-28
Supplement: Supplemental_Table_S2.xlsx [file Supplemental_Table_S2.xlsx]

## Sheet: Supplementary Table 2
Supplemental Table 2: List of Position Weight Matrices identified by MEME for the sigma factors and NAPs in this study.
RpoD PWM	RpoH PWM	RpoN PWM	Fis PWM	HimD PWM	Key:
96 10 23 20	14 41 19 60	129 85 96 116	166 102 105 127	101 133 145 117	A C G T
96 7 11 35	28 8 54 44	148 95 76 107	150 119 112 119	123 131 124 118
82 11 10 46	47 45 21 21	114 108 94 110	131 135 119 115	100 145 107 144
41 21 3 84	41 28 26 39	114 105 100 107	153 104 127 116	130 113 136 117
68 3 20 58	11 37 37 49	130 81 126 89	140 118 97 145	211 75 100 110
48 22 35 44	20 41 19 54	143 101 77 105	116 139 120 125	182 68 80 166
48 28 39 34	19 43 17 55	110 117 104 95	154 105 106 135	230 61 66 139
22 59 31 37	33 42 40 19	111 112 117 86	115 145 120 120	275 18 26 177
17 21 75 36	28 45 37 24	63 103 122 138	154 111 113 122	219 34 21 222
10 41 17 81	35 52 45 2	118 106 99 103	139 91 139 131	132 124 62 178
9 2 3 135	37 76 13 8	103 66 110 147	135 98 136 131	117 131 91 157
2 3 60 84	2 53 24 55	107 100 86 133	205 60 144 91	75 176 88 157
51 24 69 5	7 0 0 127	124 80 85 137	105 129 91 175	19 305 130 42
50 68 4 27	0 0 50 84	88 107 80 151	57 106 28 309	205 66 27 198
35 63 29 22	50 2 81 1	145 145 41 95	2 0 498 0	117 24 151 204
40 34 21 54	125 2 0 7	189 74 82 81	134 104 207 55	169 91 102 134
44 47 34 24	103 0 6 25	194 33 82 117	95 80 84 241	216 47 72 161
33 22 58 36	76 0 11 47	151 82 53 140	7 191 119 183	251 35 55 155
13 41 61 34	34 28 35 37	128 54 122 122	417 8 63 12	269 29 22 176
34 47 34 34	18 43 20 53	91 168 33 134	379 34 41 46	297 17 12 170
49 13 76 11	14 38 36 46	18 47 12 349	420 18 21 41	100 10 0 386
28 33 64 24	10 18 42 64	2 0 422 2	404 11 18 67	0 470 11 15
28 31 60 30	31 20 52 31	0 0 422 4	357 30 15 98	484 8 4 0
49 35 42 23	50 39 29 16	8 382 0 36	259 34 58 149	285 0 139 72
34 14 66 35	28 19 42 45	363 9 39 15	50 94 48 308	51 227 120 98
54 19 57 19	43 26 12 53	27 233 5 161	188 146 163 3	208 97 137 54
78 8 27 36	36 22 15 61	144 31 214 37	253 54 123 70	218 62 122 94
61 45 19 24	36 34 7 57	176 79 113 58	100 177 126 97	74 125 217 80
31 17 34 67	6 68 12 48	171 58 34 163	0 497 3 0	127 21 7 341
18 59 56 16	58 6 70 0	134 28 21 243	282 37 143 38	36 3 1 456
26 75 30 18	22 60 9 43	121 58 55 192	182 96 133 89	277 56 133 30
8 45 81 15	8 123 3 0	135 44 12 235	141 102 60 197	130 185 98 83
0 13 3 133	26 98 10 0	3 33 0 390	145 123 110 122	134 121 150 91
139 0 1 9	14 104 0 16	0 5 397 24	141 99 126 134	142 105 141 108
30 20 6 93	10 102 7 15	39 362 0 25	148 117 133 102	158 105 113 120
100 0 6 43	128 0 0 6	219 65 42 100	153 93 135 119	150 98 110 138
133 5 8 3	0 22 0 112	109 74 80 163	173 83 137 107	150 119 90 137
0 1 1 147	47 25 23 39	114 75 95 142	158 117 106 119	171 85 88 152
23 18 91 17	25 12 0 97	122 112 84 108	139 116 106 139	135 116 89 156
0 133 1 15	55 33 15 31	141 104 69 112	140 79 142 139	120 120 120 136
26 18 98 7	43 23 29 39	92 109 129 96	121 107 130 142	172 96 93 135
8 117 21 3	30 38 25 41	83 142 102 99	151 109 109 131	117 99 116 164
25 98 25 1	56 28 25 25	117 84 98 127	180 96 85 139	119 134 123 120
34 54 26 35	25 29 38 42	110 63 135 118	115 118 132 135	161 104 109 122
3 123 5 18	33 16 39 46	111 70 143 102	131 95 142 132	128 133 111 124
14 101 26 8	36 43 27 28	122 125 83 96	148 93 108 151	110 131 157 98
37 42 11 59	80 19 13 22	144 112 87 83	153 129 100 118	126 141 111 118
13 44 20 72	48 24 27 35	163 66 128 69	156 116 121 107	102 131 92 171
11 45 30 63	12 68 14 40	95 101 132 98	152 90 111 147	126 109 130 131
23 25 73 28	42 35 34 23	143 106 80 97	133 94 125 148	151 102 118 125
