# Supplementary material for: Genome-wide promoter assembly in E. coli measured at single-base resolution
Source: HighWire-hosted journal article supplement (doi:10.1101/gr.276544.121), 2022-04-28
Supplement: Supplemental_Table_S3.xlsx [file Supplemental_Table_S3.xlsx]

## Sheet: Supplementary Table 3
Supplemental Table 3: List of RpoH-bound locations, coordinates, nearest annotated gene, and annotated as to promoter motif and RpoH occupancy status.
													Adjusted based on EcoCyc
													See Table 1 of Nonaka et al
RpoH occupancy upon heat shock (-500 to +500)													Significantly induced and identified promoter (SIIP)
Midpoint = ATG TU start codon													Significantly induced but no identified promoter (SINP)
													Not significantly induced but reported promoter (NIP)
					120 genes	Transcription Unit (Nonaka et al, but some modified based on Keseler 2017 EcoCyc)	Strand	TU ATG coordinate in ec2	RpoH motif coordinate in ec2	Motif ID	RpoH occupancy level at motif	RpoH motif location relative to ATG of TU (bp)	Position In Transcription Unit_Nonaka Promoter Class (see above key)	Adjusted in this study	√=visually confirmed, x=not confirmed, w=visually consistent	46 TUs
				1	ybeZ	ybeZ ybeY ybeX cutE	-	693837	693902	fimo_9	80.6	65	1_SIIP	1_SIIP	√	RpoH-bound promoter
				2	groS	groS groL	+	4375369	4375283	fimo_11	78.3	-86	1_SIIP	1_SIIP	√	RpoH-bound promoter
				3	lon	lon	+	458113	458024	fimo_3	106	-89	1_SIIP	1_SIIP	√	RpoH-bound promoter
				4	dnaK	dnaK dnaJ yi81_1yi82_1	+	12164	12111	fimo_10	78.3	-53	1_SIIP	1_SIIP	√	RpoH-bound promoter
				5	rrmJ	rrmJ/rlmE ftsH	-	3327517	3327597	fimo_6	90.8	80	1_SIIP	1_SIIP	√	RpoH-bound promoter
				6	htpG	htpG	+	494345	494192	fimo_439	43.9	-153	1_SIIP	1_SIIP	√	RpoH-bound promoter
				7	ibpA	ibpA ibpB	+	3772994	3772885	fimo_27	62.4	-109	1_SIIP	1_SIIP	√	RpoH-bound promoter
				8	fxsA	fxsA	+	4373345	4373271	fimo_20	67.7	-74	1_SIIP	1_SIIP	√	RpoH-bound promoter
				9	ybeD	ybeD lipB	-	663062	663139	fimo_2	112	77	1_SIIP	1_SIIP	√	RpoH-bound promoter
				10	grpE	grpE	-	2749362	2749414	fimo_8	85.8	52	1_SIIP	1_SIIP	√	RpoH-bound promoter
				11	yccV	yccV	-	1029141	1029176	fimo_21	66	35	1_SINP	1_SIIP	√	RpoH-bound promoter
				12	yceP	yceP	-	1122530	1122618	fimo_16	70.4	88	1_SIIP	1_SIIP	√	RpoH-bound promoter
				13	clpB	clpB	-	2732827	2732872	fimo_18	68.6	45	1_SIIP	1_SIIP	√	RpoH-bound promoter
				14	hslV	hslV hslU	+	3514395	3514320	fimo_7	87.5	-75	1_SIIP	1_SIIP	√	RpoH-bound promoter
				15	prlC	prlC yhiQ	+	3995234	3995165	fimo_24	64.5	-69	1_SIIP	1_SIIP	√	RpoH-bound promoter
				16	gapA	gapA yeaD	+	1864486	1864319	fimo_5	93.3	-167	1_SIIP	1_SIIP	√	RpoH-bound promoter
				17	clpP	clpP clpX	+	455902	455817	fimo_17	69.3	-85	1_SIIP	1_SIIP	√	RpoH-bound promoter
				18	yhdN	yhdN zntR	+	4200908	Not found	None	-		1_SIIP	1_SINP	√	RpoH-bound promoter
				19	ycjX	ycjX ycjF tyrR	+	1385832	1385772	fimo_455	43.8	-60	1_SIIP	1_SIIP	√	RpoH-bound promoter
				20	yciS	yciS yciM pyrF yciH	+	1341958	Not found	None	-		1_SIIP	1_SINP	√	RpoH-bound promoter
				21	ybbN	ybbN	-	517501	517539	fimo_14	73.5	38	1_SINP	1_SIIP	√	RpoH-bound promoter
				22	topA	topA	+	1332763	Not found	None	-		1_SIIP	1_SINP	√	RpoH-bound promoter
				23	htpX	htpX	-	1914288	1914343	fimo_98	51.7	55	1_SIIP	1_SIIP	√	RpoH-bound promoter
				24	yrdA	yrdA	-	4211178	Not found	None	-		1_SINP	1_SINP	√	RpoH-bound promoter
				25	yafD	yafD yafE	+	231123	231060	fimo_346	45.1	-63	1_SIIP	1_SIIP	√	RpoH-bound promoter
				26	mutM	mutM	+	3829264	Not found	None	-		1_SIIP	1_SINP	√	RpoH-bound promoter
				27	dgsA	dgsA	-	1670276	Not found	None	-			1_SINP	w	RpoH-bound promoter
				28	miaA	miaA hfq hflX hflK hflC	+	4403933	4404066	fimo_109	51.4	133	1_SIIP	1_SIIP	√	RpoH-bound promoter
				29	rpoE		-	2708666							x
				30	phoB	phoB phoR	+	416367	Not found	None	-		1_SINP		x
				31	ribE	ribE nusB thiL pgpA	-	433872	Not found	None	-		1_SIIP	1_SINP	w	RpoH-bound promoter
				32	ftsH	rrmJ ftsH folP	-	3326788	Not found	None	-		2_SIIP		x
				33	creA	creA creB creC	+	4640202	Not found	None	-		1_SIIP	1_SINP	√	RpoH-bound promoter
				34	phoR	phoB phoR	+	417114	Not found	None	-		2_SINP		x
				35	glnS	glnS	+	706516	Not found	None	-		1_SIIP	1_SINP	w	RpoH-bound promoter
				36	metA	metA	+	4217871	Not found	None	-		1_NIP		x
				37	hfq	mutL miaA hfq hflX hflK hflC	+	4404969	Not found	None	-		3_SIIP		x
				38	rseA		-	2708058							x
				39	yfbQ		+	2413008							x
				40	stpA		-	2797149							x
				41	hepA	hepA	-	63262	63599	fimo_99	51.7	337	1_SIIP	1_SIIP	√	RpoH-bound promoter
				42	yrhB		-	4055654							x
				43	can		-	142668							x
				44	hflX	miaA hfq hflX hflK hflC	+	4405353					3_SIIP		x
				45	gyrB	recF gyrB	+	3760297					2_SINP		x
				46	gntY	gntY	-	4094790	4094969	fimo_123	50.6	179	1_SIIP	1_SIIP	√	RpoH-bound promoter
				47	recF	recF gyrB	+	3759195	Not found	None	-		1_SINP		√	RpoH-bound promoter
				48	bolA		+	453697							x
				49	ffh	ffh	-	2746449					1_SINP		x
				50	yheO		+	4163977							x
				51	rpoD	rpoD	+	3211704	3211332	fimo_29	62.2	-372	1_SIIP	1_SIIP	√	RpoH-bound promoter
				52	hslO	hslR hslO	-	4110640					2_SIIP		x
				53	ptsH	ptsH ptsI	+	2539211					1_NIP		x
				54	yggV		+	3095338							x
				55	rseB		-	2707408							x
				56	gnd		-	2103403							x
				57	valS	holC valS	-	4488515					2_SIIP		x
				58	ybfE		-	712318							x
				59	sdaA	sdaA	+	1898647	Not found	None	-		1_SIIP		√	RpoH-bound promoter
				60	ppiD	ppiD	+	461140					1_NIP		x
				61	phoP	phoP phoQ	-	1192022	Not found	None	-		1_SIIP		w	RpoH-bound promoter
				62	ydhQ	ydhQ	-	1747839	Not found	None	-		1_SIIP		√	RpoH-bound promoter
				63	ibpB	ibpA ibpB	+	3773519					2_SIIP		x
				64	folP	rrmJ ftsH folP	-	3324764					3_SIIP		x
				65	xerD	xerD dsbC recJ	-	3038397					Weak original evidence
				66	holC	holC valS	-	4488958	Not found	None	-		1_SIIP		w	RpoH-bound promoter
				67	clpX	clpP clpX	+	456651					2_SIIP		x
				68	yrfG	yrfG hslR	-	4111745							x
				69	ileS	ileS lspA fkpB ispH	+	22392	Not found	None	-		1_SIIP		√	RpoH-bound promoter
				70	dnaJ	dnaK dnaJ yi81_1yi82_1	+	14169					2_SIIP		x
				71	rseC		-	2706455							x
				72	lipB	ybeD lipB	-	662698					2_SIIP		x
				73	dsbB		-	1234605							x
				74	hscA		-	2657589							x
				75	narP	narP	+	2293835	Not found	None	-		1_SIIP		√	RpoH-bound promoter
				76	mutL	mutL miaA hfq hflX hflK hflC	+	4402093	Not found	None	-		1_SIIP		x
				77	ygaD	pncC recA	-	2823000	Not found	None	-		1_SIIP		w	RpoH-bound promoter
				78	hslR	hslR hslO	-	4111066	4111318	fimo_13	75.1	252	1_SINP	1_SIIP	√	RpoH-bound promoter
				79	hscC		-	683813							x
				80	cspD	cspD	-	923010					1_SINP		x
				81	menA	hslV hslU menA	+	3516333					3_SIIP		x
				82	yhiQ	prlC yhiQ	+	3997284					2_SIIP		x
				83	hflK	hfq hflX hflK hflC	+	4406719					3_SIIP		x
				84	groL	groS groL	+	4375706					2_SIIP		x
				85	ygbF	ygbF	-	2877507	Not found	None	-		1_SIIP		w	RpoH-bound promoter
				86	hflC	hfq hflX hflK hflC	+	4407981					4_SIIP		x
				87	ybaO	ybaO	+	467608					1_SINP		x
				88	sdaC	sdaC sdaB	+	2926886	2926542	fimo_864	40.8	-344	1_SINP	1_SIIP	√	RpoH-bound promoter
				89	fkpB	ileS lspA fkpB ispH	+	25827					3_SIIP		x
				90	hslU	hslV hslU menA	+	3514935					2_SIIP		x
				91	hscB		-	2658121							x
				92	creB	creA creB creC	+	4640688					2_SIIP		x
				93	ptsG		+	1159447							x
				94	degP		+	180885							x
				95	ispH	ileS lspA fkpB ispH	+	26278					4_SIIP		x
				96	gntX	gntX gntY	-	4095532							x
				97	insL-1		+	15446							x
				98	lspA	ileS lspA fkpB ispH	+	25208					2_SIIP		x
				99	htgA		+	10831							x
				100	phoQ	phoP phoQ	-	1191351					2_SIIP		x
				101	yggW	rdgB yggW	+	3095924					2_SIIP		x
				102	ybeX	ybeZ ybeY ybeX cutE	-	692204					3_SIIP		x
				103	yfjN	yfjN	+	2764575					1_SIIP		w	RpoH-bound promoter
				104	moaA		+	817467							x
				105	araB	araB	-	70046					1_SINP		x
				106	ydiH	ydiH	-	1766915					1_SINP		x
				107	sbcB		+	2084894							x
				108	yafE	yafD yafE	+	231927					2_SIIP		x
				109	tyrR	ycjX ycjF tyrR	+	1388435					3_SIIP		x
				110	clpS		+	923336							x
				111	insL-3		+	2219777							x
				112	pspA		+	1369794							x
				113	yeaD	gapA yeaD	+	1865565					2_SIIP		x
				114	ldhA	ldhA hslJ	-	1444555					1_SINP		x
				115	hslJ	ldhA hslJ	-	1443455					2_SINP		x
				116	azoR		-	1484572							x
				117	nohA	nohA	-	1638079					1_SINP		x
				118	yceI	yceJ yceI	-	1120051					2_SIIP		x
				119	ycjF	ycjX ycjF tyrR	+	1387226					2_SIIP		x
				120	galT	galT	-	791449					1_SINP		x
					rrsH	+	+	.	223594	fimo_44	59
					clpA	+	+	.	922321	fimo_122	50.6
					lolE	+	-	.	1175581	fimo_101	51.6
					feaR	-	-	.	1444235	fimo_26	63.5
					yeaG	+	-	.	1864261	fimo_120	50.8
					yeaG		-	.	1864278	fimo_1030	40
							-	.	2273204	fimo_652	42.1
							-	.	2730156	fimo_917	40.5
							+	.	2754389	fimo_257	46.7
							+	.	2946406	fimo_85	52.6
							+	.	3353947	fimo_942	40.4
							-	.	3428708	fimo_64	55
							-	.	3645557	fimo_438	44
							-	.	3686250	fimo_924	40.5
							-	.	3714509	fimo_492	43.4
							-	.	3724992	fimo_453	43.8
							-	.	3726957	fimo_1011	40.1
							+	.	4165603	fimo_4	97.4
							+	.	4165604	fimo_706	41.7
							-	.	4191119	fimo_457	43.7
							+	.	4211477	fimo_45	59
							-	.	4334994	fimo_807	41.2
							-	.	4610758	fimo_751	41.5
